# Supplementary material for: Transcriptional specialization shapes abnormal cortical morphological similarity gradients in Wilson's disease
Source: Research Square preprint supplement (doi:10.21203/rs.3.rs-6250277/v1), 2025-06-10
Supplement: Supplementary file 1 [file 05de35b42d4dbd0f4a5c5cb4.docx]

**Supporting information for**

**Transcriptional specialization shapes abnormal cortical morphological similarity gradients in Wilson's disease.**

Yuqi Song1#, Weiqi Wang1#, Sheng Hu3, Yulong Yang1, Chuanfu Li1, Kou Xu1, Zilong Li1, Taohua Wei1,2*, Wenming Yang1,2*

**Author affiliations:**

1 The First Affiliated Hospital of Anhui University of Chinese Medicine, Hefei, Anhui, China

2 Key Laboratory of Xin'An Medicine, Ministry of Education, Hefei, Anhui, China

3 School of Medical Information Engineering, Anhui University of Chinese Medicine; Hefei, Anhui, China

Correspondence to: Wenming Yang

Department of Neurology, The First Affiliated Hospital of Anhui University of Chinese Medicine, Hefei, Anhui, 230000, China

Email: yangwm8810@126.com

Correspondence may also be addressed to: Taohua Wei

Department of Neurology, The First Affiliated Hospital of Anhui University of Chinese Medicine, Hefei, Anhui, 230031, China

Email: weitaohua@foxmail.com

**Running title:** Genetics of the cortical microstructure

**Summary:**

2 Supplementary Color Figures

3 Supplementary Tables

# Supplementary Figure 1


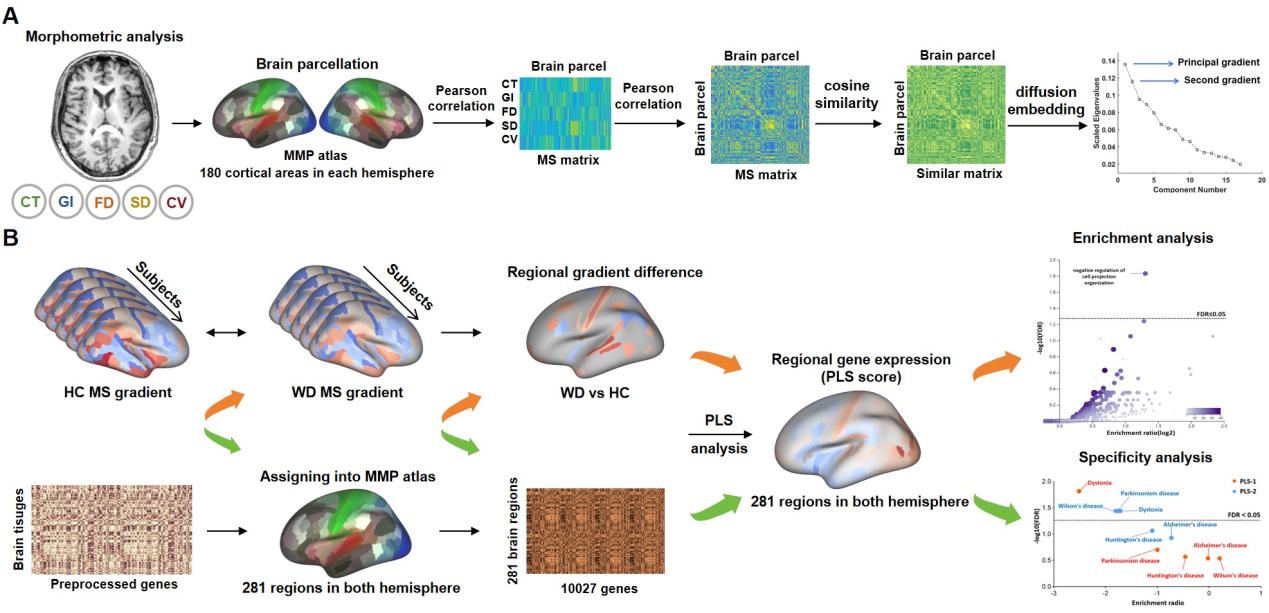


**Supplementary Figure 1 Study overview.** **(A)** Similarity gradient analysis for cortical morphological. Five morphological indicators of the cortex were extracted, followed by establishment of the MS matrix through Pearson correlation analysis between any two cortical ROI nodes. The MS matrix was applied to the diffusion graph embedding method to calculate the connectome gradient. **(B)** MS gradient and gene expression in WD groups and HC groups were mapped onto 360 cortical packages. PLS regression analysis was then conducted to assess the relationship between MS gradient differences and gene expression. Finally, enrichment and specificity analyses identified the biological processes affected by gradient perturbation. WD, Wilson’s disease; HC, healthy control; PLS, partial least squares.

# Supplementary Figure 2


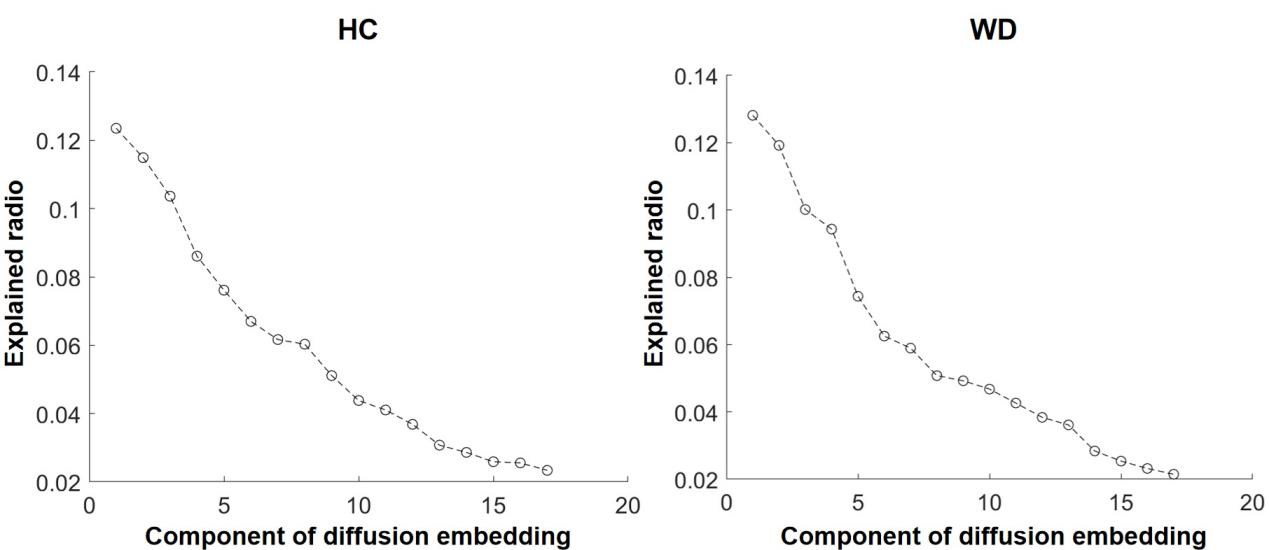


**Supplementary Figure 2 The averaged explained ratio (λ values).** The first gradient explained 13.1% ± 0.4% of the total variance in the WD group and 12.9% ± 0.6% of the total variance in the HC group. The secondary gradient explained 12.0% ± 0.5% of the total variance in the WD group and 11.6% ± 0.5% of the total variance in the HC group. WD, Wilson’s disease; HC, healthy control.

# Supplementary Tables

**Supplementary Table 1** The lists of candidate genes used for disease specificity analysis are presented in Fig. 4 and 5.

| A | *ATP7B,PKHD1,NPC1,PKD1,GAA,ZEB2,APP,GBA1,LMNA,PSEN1,VWF,APOE,NOD2,DYNC1H1,GBE1,LRRK2,MFN2,MPZ,PKD2,SMPD1,SLC17A5,SQSTM1,GLA,PRNP,ABCA4,TNF,IGHMBP2,SNCA,ATP7A,RET,G6PC1,AARS1,NAGLU,PRKN,HEXA,MAPT,VCP,IL10,DNM2,IL6,PYGM,KIF1B,PMP22,TERT,COL1A1,HEXB,PINK1,GALC,GARS1,TGFB1,CYBB,GJB1,BCKDHB,EGR2,RPL36A-HNRNPH2,SLC37A4,ABCA1,INF2,DBT,MED25,NDRG1,LAS1L,PSAP,CEP290,PIK3CA,PSEN2,MARS1,ACE,HFE,TP53,PARK7,LRP5,HBB,LRSAM1,SERPINA1,CYBA,PHKA2,PRKAG2,GYS1,NPC2,BDNF-AS,ENG,LIPA,IL1B,NOTCH1,NCF2,IL10RA,TNFRSF11B,EDNRB,CLCN5,UMOD,ELP1,CTLA4,HTT,HSPB1,RYR1,SOD1,HLA-DRB1,IFNG,LITAF* |
| --- | --- |
| B | *APP,PSEN1,APOE,PKHD1,MAPT,NPC1,PKD1,GAA,GBA1,AGL,PSEN2,TNF,PRNP,SNCA,VCP,LMNA,LOC106627981,LRRK2,VWF,NEFL,DYNC1H1,NOD2,SQSTM1,GBE1,ACE,HFE,SMPD1,MFN2,MPZ,NOS3,BACE1,PRKN,MPO,ATP7B,MT-ND1,IL6,BDNF-AS,ABCA4,IL10,GDAP1,PINK1,SLC17A5,AARS1,G6PC1,GRN,RET,DNM2,TGFB1,ABCA1,SORL1,FIG4,KIF1B,TERT,PMP22,COL1A1,HEXB,NAGLU,ABCA7,GALC,CYBB,GARS1,PARK7,EGR2,IL1B,CDKN2B-AS1,SYNJ1,PIK3CA,MIR146A,GJB1,CSF1R,LRP5,PLAU,TREM2,ATP7A,PSAP,NPC2,DBT,NDRG1,NOTCH1,TP53,MIR29A,HFE-AS1,MIR34A,CEP290,HLA-DRB1,GFAP,MIR22,HTT,IFNG,MTMR2,PLEKHG5,SOD1,LRSAM1,BDNF,SERPINA1,MORC2,LIPA,CYBA,MTHFR,TRPV4* |
| C | *GBA1,LRRK2,SNCA,PRKN,MAPT,LOC106627981,NPC1,GAA,PARK7,PINK1,AGL,PSEN1,APP,APOE,LMNA,DYNC1H1,NOD2,MFN2,SMPD1,SQSTM1,NEFL,PSAP,PRNP,NR4A2,GBE1,VCP,ATP7B,PKD2,SYNJ1,GLA,TNF,PINK1-AS,ABCA4,MT-ND1,AARS1,UCHL1,GDAP1,ATXN3,SLC17A5,FIG4,BDNF-AS,PRKAG2,G6PC1,RET,IL10,ATXN2,HEXA,IL6,VPS13C,PLA2G6,SLC6A3,PYGM,DNM2,NAGLU,GALC,ATP13A2,H19,DNAJC13,VPS35,SNCAIP,KIF1B,POLG,COL1A1,TERT,PSEN2,DNAJC6,CYBB,RPL36A-HNRNPH2,GRN,GARS1,ACE,GJB1,BCKDHB,TGFB1,TARDBP,TH,BCKDHA,ATP7A,SPG11,TBP,DBT,ABCA1,CEP290,PIK3CA,GIGYF2,HTT,GUCY2D,GDNF,SOD1,MT-ND5,IL1B,LAMP2,HFE,LRP5,FGD4,TP53,MARS1,MALAT1,IFNG,NPC2* |
| D | *GAA,NPC1,AGL,HTT,PSEN1,GBA1,APP,PRNP,DYNC1H1,APOE,LRRK2,MFN2,GBE1,NEFL,BDNF-AS,LOC106627981,SQSTM1,MAPT,ATP7B,SNCA,PSEN2,GLA,PRKN,VCP,GDAP1,TNF,AARS1,HEXA,PINK1,DNM2,KIF1B,IL6,TERT,CYBB,GARS1,TGFB1,GJB1,INF2,PARK7,SYNJ1,SLC37A4,NDRG1,ABCA1,MEG3,TP53,ACE,MARS1,NPC2,SERPINA1,GYS1,TUG1,LOC109461479,MIR132,IL1B,LIPA,MORC2,STXBP2,MIR22,HSPB1,ELP1,PFKM,UMOD,MIR29A,CTLA4,GFAP,HLA-DRB1,GDNF,CBS,BDNF,NEAT1,SOD1,H19,IFNG,TRIM2,ATXN3,AR,MIR29C,LAMP2,UCHL1,JPH3,ITCH,TPP1,HLA-DQB1,ATP2A2,TARDBP,POLG,SLC19A3,TBP,YARS1,TLR4,MT-ND1,MIR21,PYGL,COPA,MPO,CYP27A1,GANAB,PINK1-AS,SEC63,MTHFR* |
| E | *GCH1,SGCE,TOR1A,ATP1A3,TH,THAP1,CASD1,SLC6A3,ANO3,KMT2B,GNAL,TUBB4A,SPR,PRKRA,SLC2A1,KCTD17,TAF1,CIZ1,ACTB,TIMM8A,HPCA,LOC130055692,DRD2,SLC30A10,EIF2AK2,PANK2,TBC1D24,SHQ1,DYT15,COL6A3,PRRT2,SLC39A14,CHROMR,SLC18A2,DYT7,NR4A2,MT-ND6,MECR,VPS16,PLA2G6,C19orf12,PLEKHG2,PNKD,DYT21,DYT13,DYT23,SCN2A,MT-ND1,DYT17,BCAP31,IMPDH2,CACNA1B,LOC130063295,TSPOAP1,LOC129934069,FA2H,MT-ND4,NPC1,WDR45,SQSTM1,AOPEP,MT-ND3,MECP2,ATP5MC3,AFG3L2,SCP2,VPS11,GNB1,MVP-DT,KCNN2,NKX2-1,PCDH12,CACNA1A,ARX,SFTA3,SLC2A1-DT,WARS2,RHOBTB2,ATP13A2,GJC2,PRKN,NUP54,RNF14,LOC126863256,SERAC1,SLC19A3,CASK,DRD5,CSTB,SLC18A2-AS1,TBP,LOC109610631,AFG2B,ADCY5,FITM2,EIF2B5,WDR73,ARF3,SPG11,CAMK2B* |

(A) Wilson’s disease, (B) Alzheimer’s disease, (C) Parkinson’s disease,(D) Huntington’s disease, (E) Dystonia

**Supplementary Table 2** Between-group differences in the first gradient scores of the

subnetworks in the mean maps.

| Subnetworks | *t* | *PFDR* |
| --- | --- | --- |
| Visual | -2.211 | 0.0282154903 |
| Somatomotor | -5.407 | 0.0000001912 |
| Auditory | 3.786 | 0.0002048387 |
| Dorsal-Attention | 3.272 | 0.0012668345 |
| Ventral-Attention | -2.005 | 0.0464050948 |
| Frontoparietal | 0.071 | 0.9435931855 |
| Cingulo-Opercular | 5.829 | 0.0000000236 |
| Default | -0.931 | 0.3530419242 |

Abbreviations: FDR, false discovery rate.

**Supplementary Table 3** Between-group differences in the second gradient scores of the subnetworks in the mean maps.

| Subnetworks | *t* | *PFDR* |
| --- | --- | --- |
| Visual | -8.188 | 0.00000000000 |
| Somatomotor | -2.175 | 0.03084835011 |
| Auditory | -2.751 | 0.00651051423 |
| Dorsal-Attention | 7.91 | 0.00000000000 |
| Ventral-Attention | 1.236 | 0.21811103634 |
| Frontoparietal | 6.298 | 0.00000000204 |
| Cingulo-Opercular | -1.416 | 0.15849869675 |
| Default | 0.055 | 0.95612242970 |

Abbreviations: FDR, false discovery rate.
